# Supplementary figures and images for: Generation and initial characterization of novel tumour organoid models to study human pancreatic cancer‐induced cachexia
Source: PubMed Central journal article supplement — J Cachexia Sarcopenia Muscle. 2020 Oct 13;11(6):1509–24. doi: 10.1002/jcsm.12627 (PMC7749546; doi:10.1002/jcsm.12627), 2020-10-13

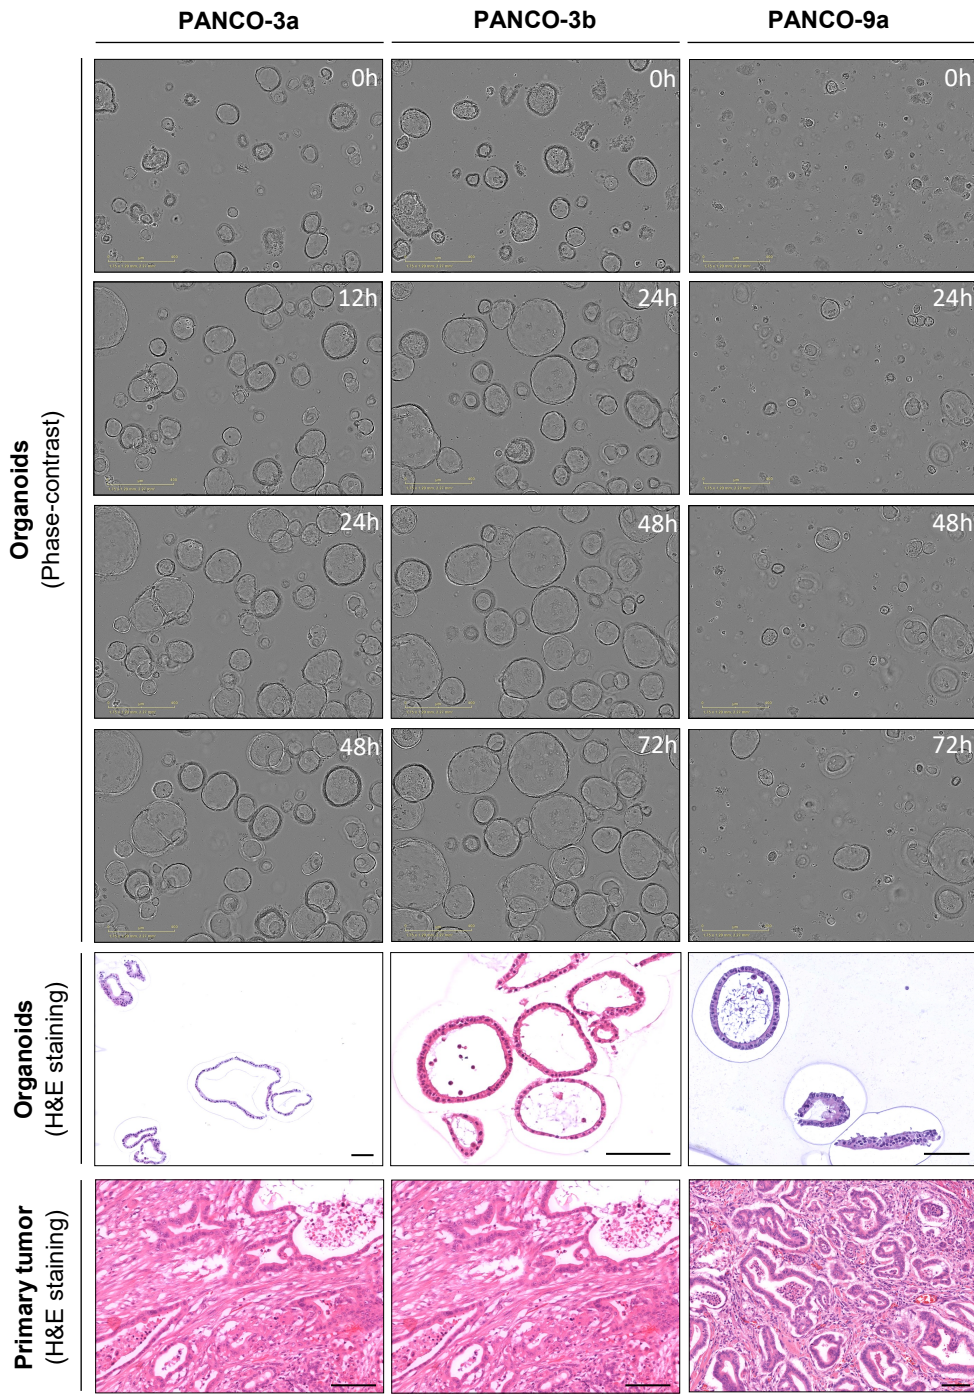

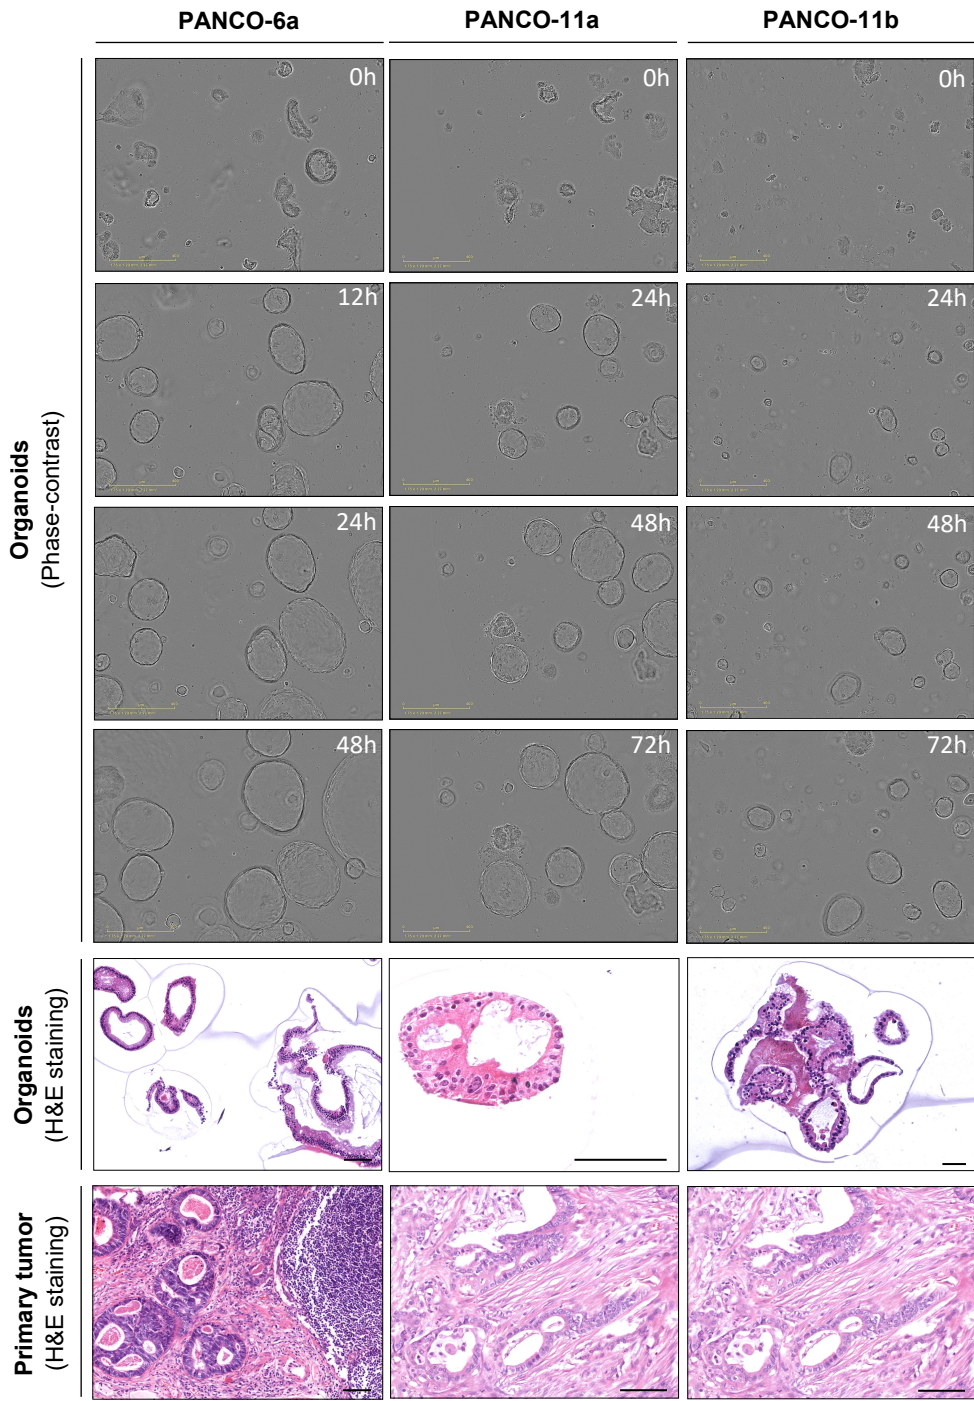

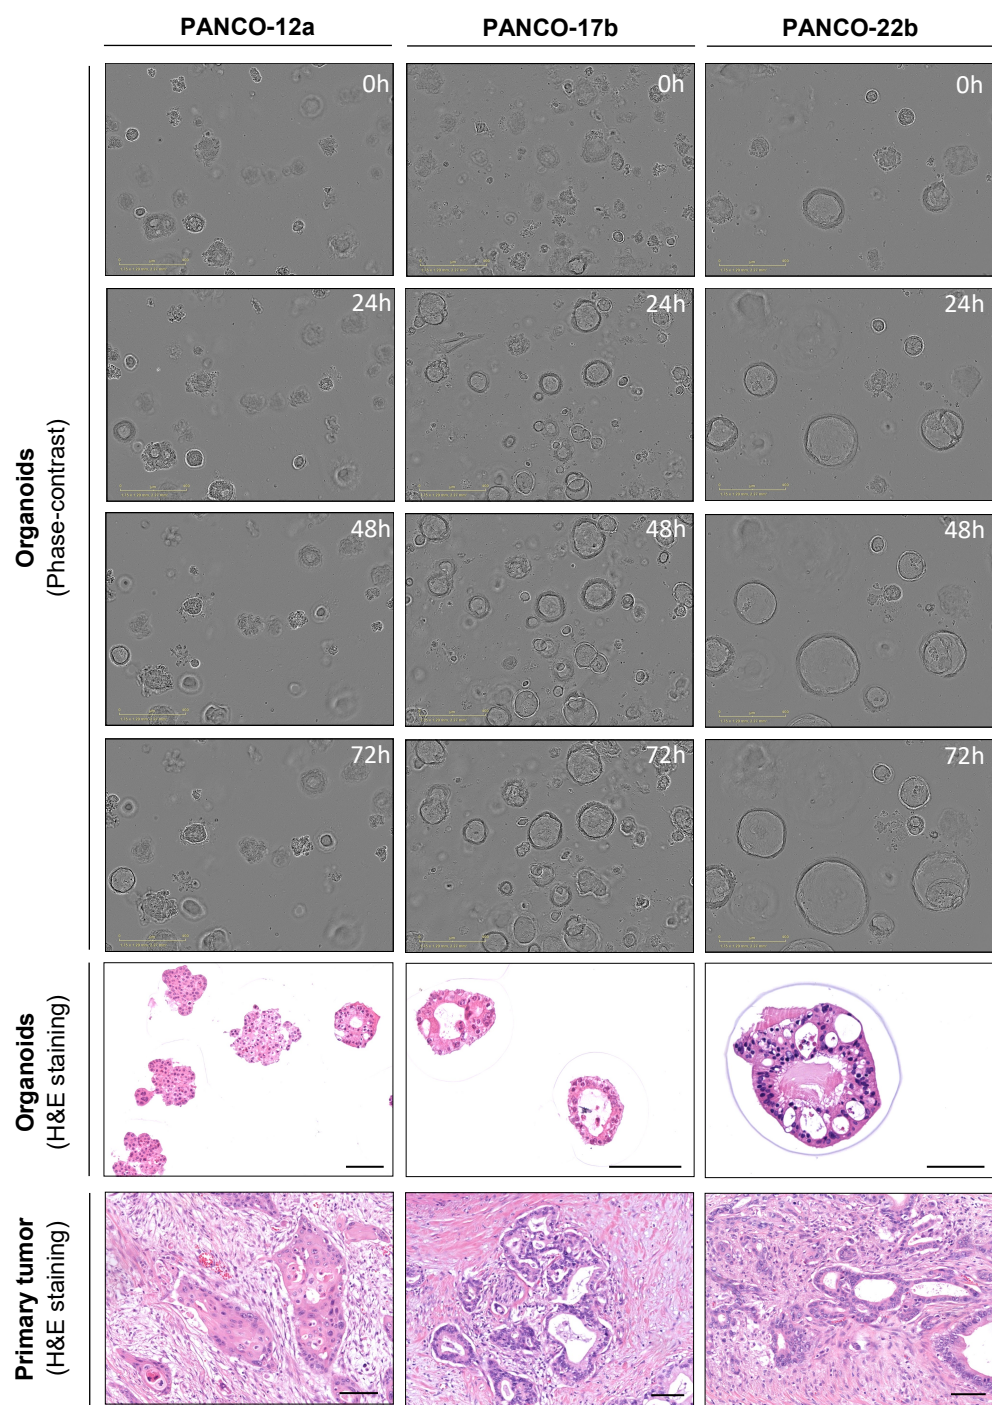

Figure S1, Morphological characterization of pancreatic tumor organoids

Supplement: JCSM-11-1509-s002.pdf [file JCSM-11-1509-s002.pdf]
